# Supplementary material for: Acid-labile polysaccharide prodrug via lapatinib-sensitizing effect substantially prevented metastasis and postoperative recurrence of triple-negative breast cancer
Source: Royal Society of Chemistry journal article supplement (doi:10.1039/d0nr03395b), 2020-01-01
Supplement: d0nr03395b1.pdf [file d0nr03395b1.pdf]

## Supporting Information

# Acid-Labile Polysaccharide Prodrug via Lapatinib Sensitizing Effect Substantially Prevented Metastasis and Postoperative Recurrence of Triple Negative Breast Cancer

*Junhui Sui,<sup>a</sup> Mingda Zhao,<sup>a</sup> Yuedi Yang,<sup>a</sup> Zhihao Guo,<sup>b</sup> Mengcheng Ma,<sup>a</sup> Zhiyi Xu,<sup>a</sup> Jie Liang,<sup>a</sup> Yong Sun,<sup>a\*</sup> Yujiang Fan,<sup>a\*</sup> and Xingdong Zhang<sup>a</sup>*

<sup>a</sup>National Engineering Research Center for Biomaterials, Sichuan University, 29 Wangjiang Road, Chengdu, Sichuan, 610064, P. R. China

<sup>b</sup>Center for Molecular Science and Engineering, College of Science, Northeastern University, Shenyang 110819, China.

## Corresponding Author

Yong Sun\*

Biomaterials Building, Sichuan University, Chengdu 610064, China

Tel: +86-28-85417654 Fax: +86-28-85417654 e-mail: sunyong8702@scu.edu.cn

Yujiang Fan\*

Biomaterials Building, Sichuan University, Chengdu 610064, China

Tel: +86-28-85416196 Fax: +86-28-85410246 e-mail: [fan\\_yujiang@scu.edu.cn](mailto:fan_yujiang@scu.edu.cn)

## Supplementary Tables

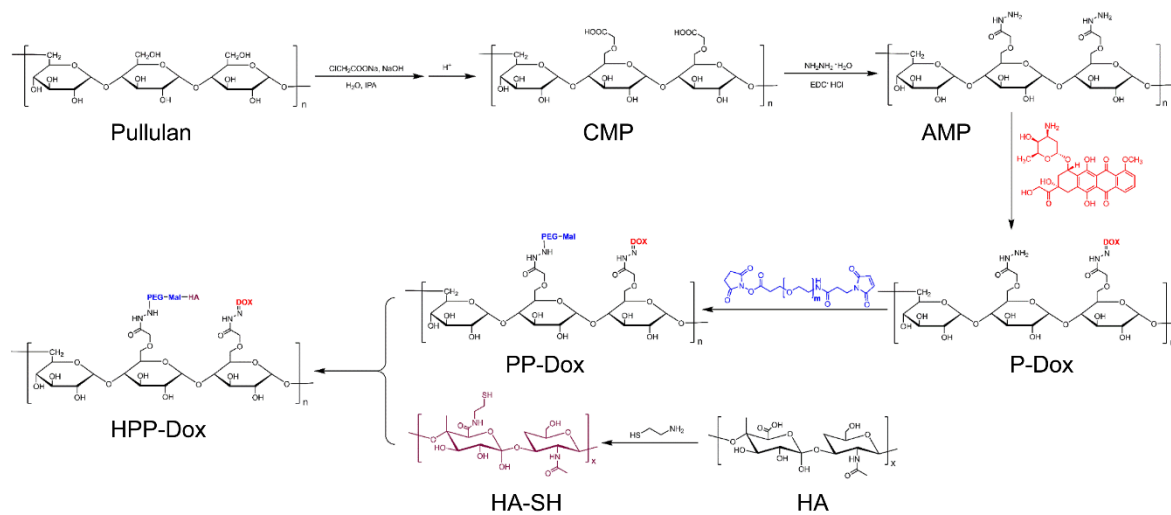

**Figure S1.** Synthetic routes of HPP-Dox.

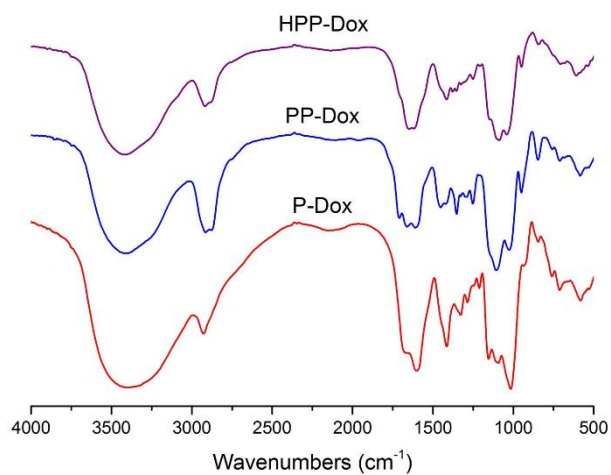

**Figure S2.** FT-IR spectra of polymers.

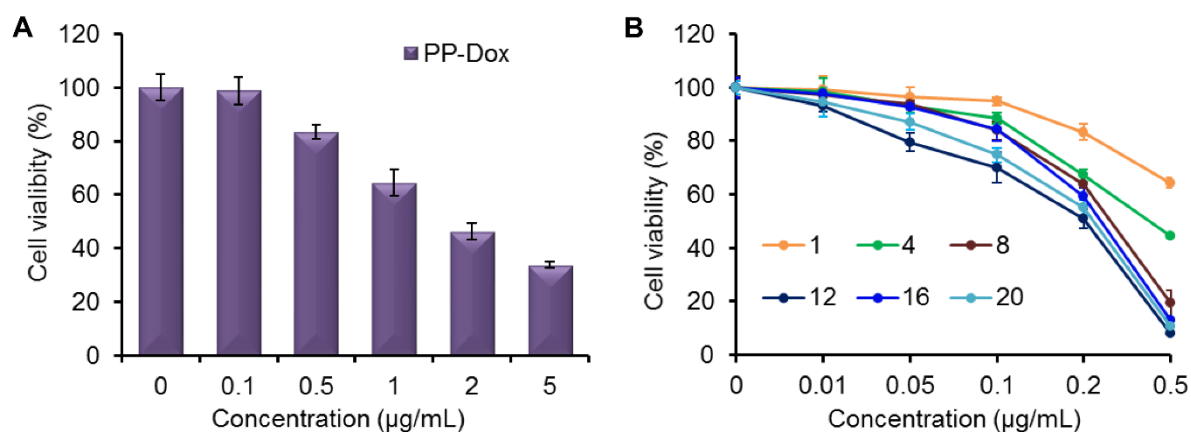

**Figure S3.** The relative cell viabilities of 4T1 cells incubated with different concentration of (A) PP-Dox and (B) PP-Dox/Lap with different ratio of Dox/Lap for 24 h. 1, 4, 8, 12, 16 and 20 represented PP-Dox/Lap that the theoretical ratio of Lap with Dox was 1, 4, 8, 12, 16 and 20, respectively.

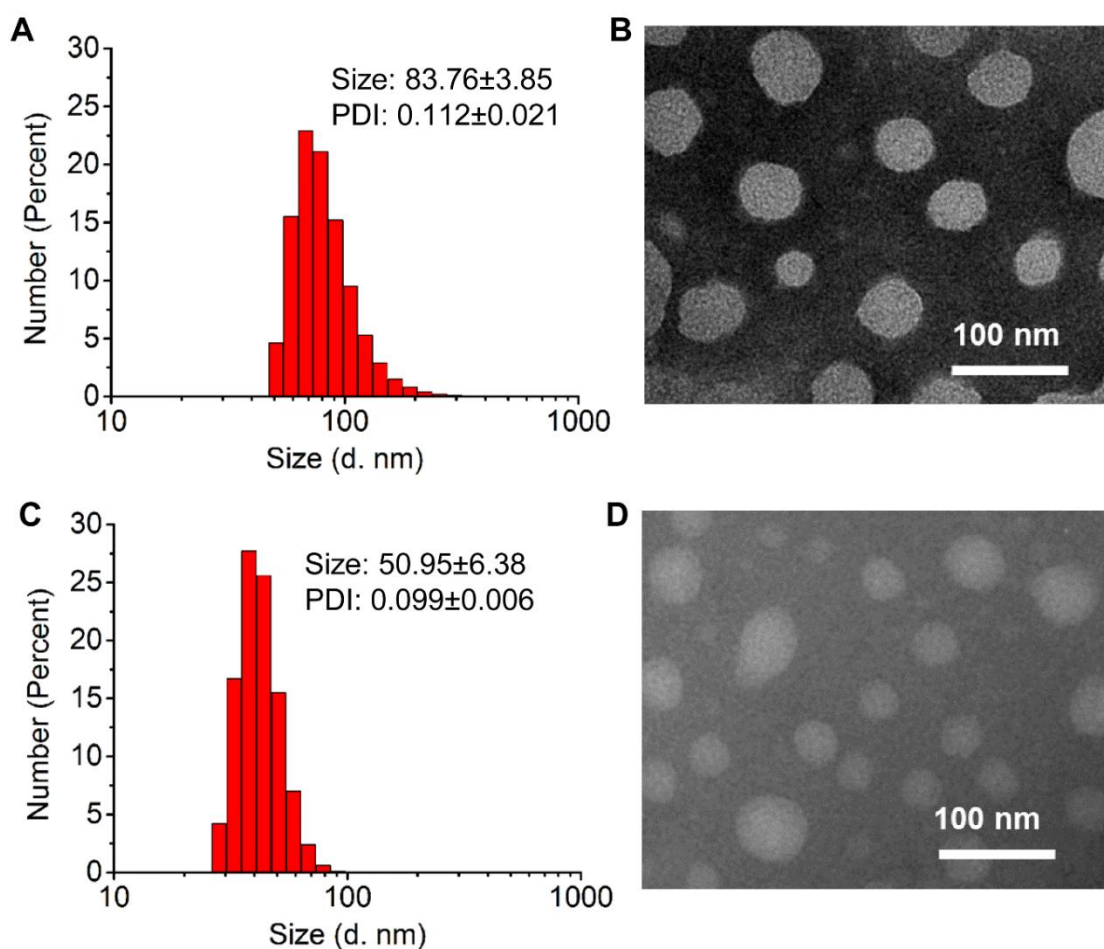

**Figure S4.** DLS data of (A) PP-Dox/Lap and (C) HPP-Dox/Lap NPs. TEM images of (B) PP-Dox/Lap and (D) HPP-Dox/Lap NPs.

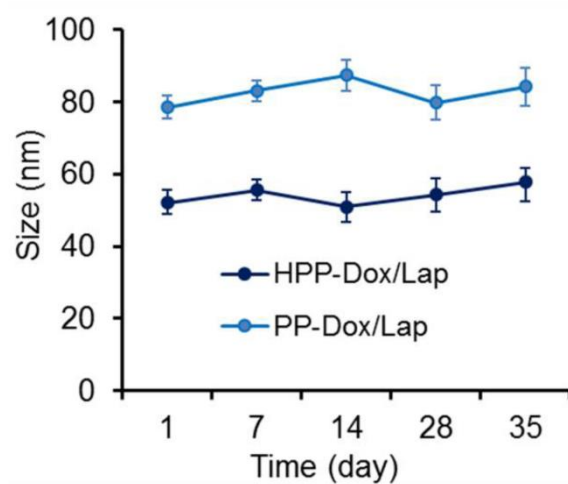

**Figure S5.** The size changes of PP-Dox/Lap and HPP-Dox/Lap NPs with time at 1.0 mg/mL in PBS.

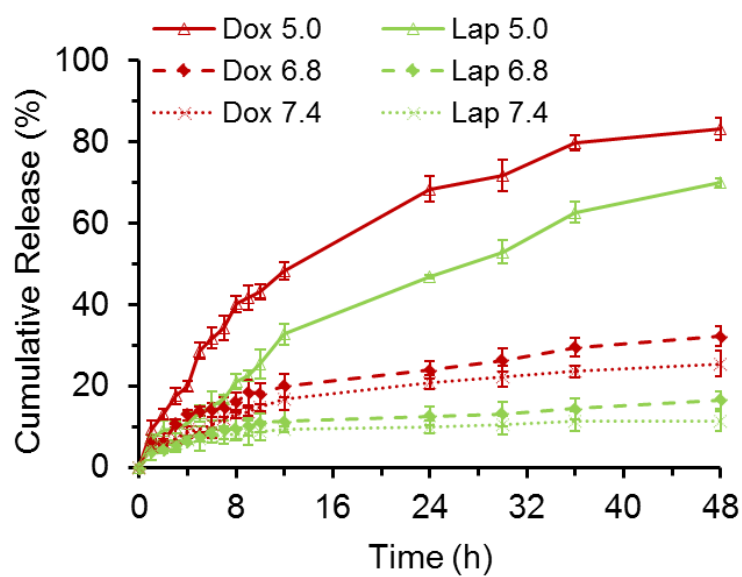

**Figure S6.** *In vitro* release profiles of Dox and Lap from HPP-Dox/Lap NPs in pH 7.4, pH 6.8 and pH 5.0 media at 37 °C.

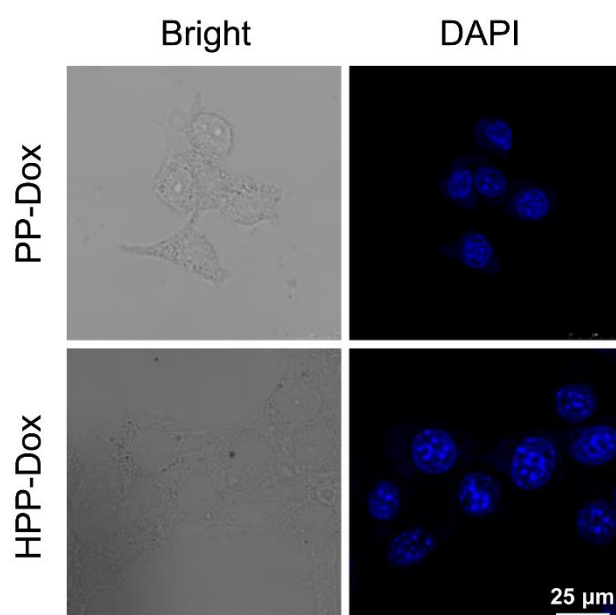

**Figure S7.** CLSM images of bright and DAPI of 4T1 cells after 4 h incubation with PP-Dox and HPP-Dox.

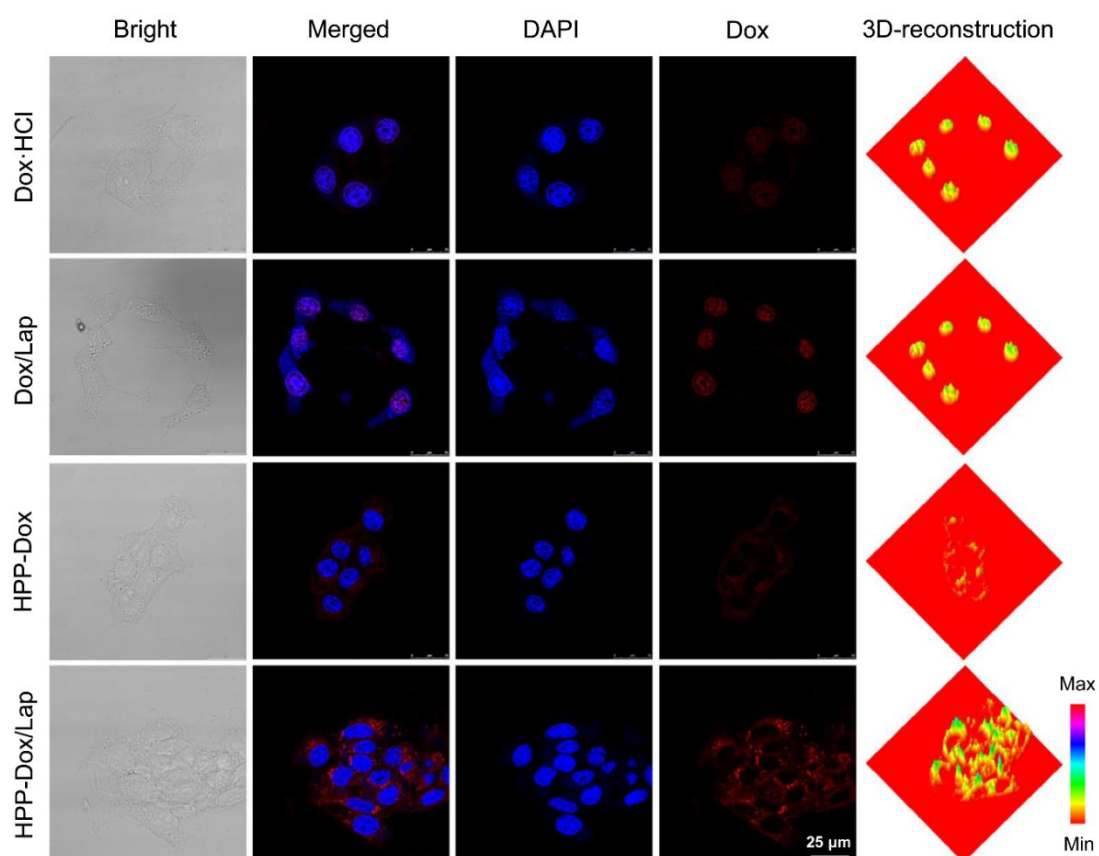

**Figure S8.** CLSM images and 3D-reconstruction images of Dox penetration into 4T1 cells after 1 h incubation with different formulations.

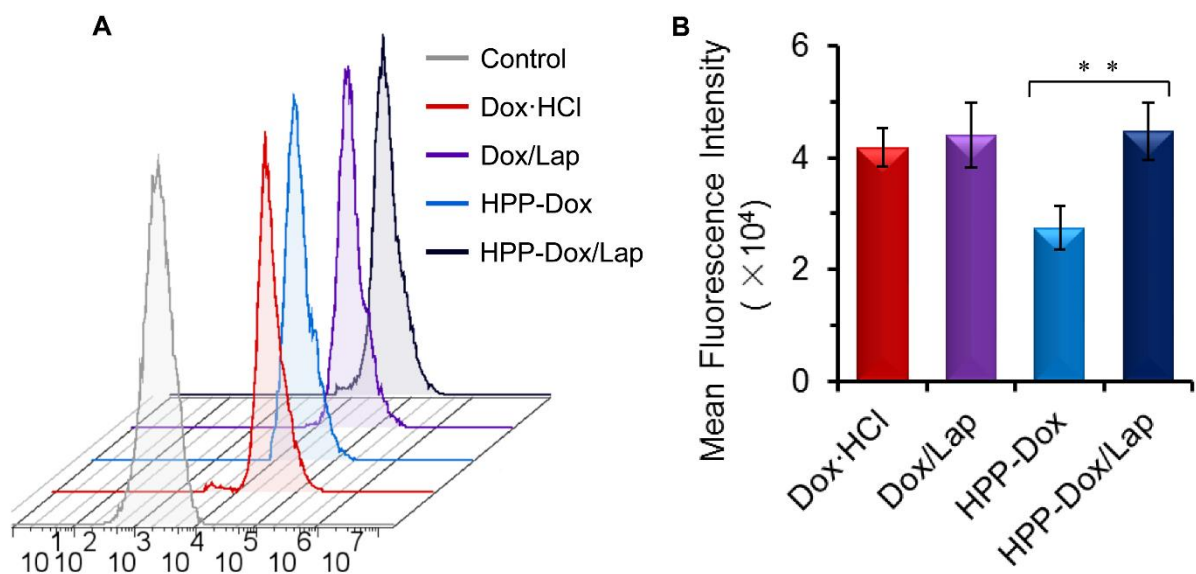

**Figure S9.** (A) Flow cytometry analysis and (B) Mean fluorescence intensity of intracellular Dox from the flow cytometric results after incubation with different formulations for 1 h.

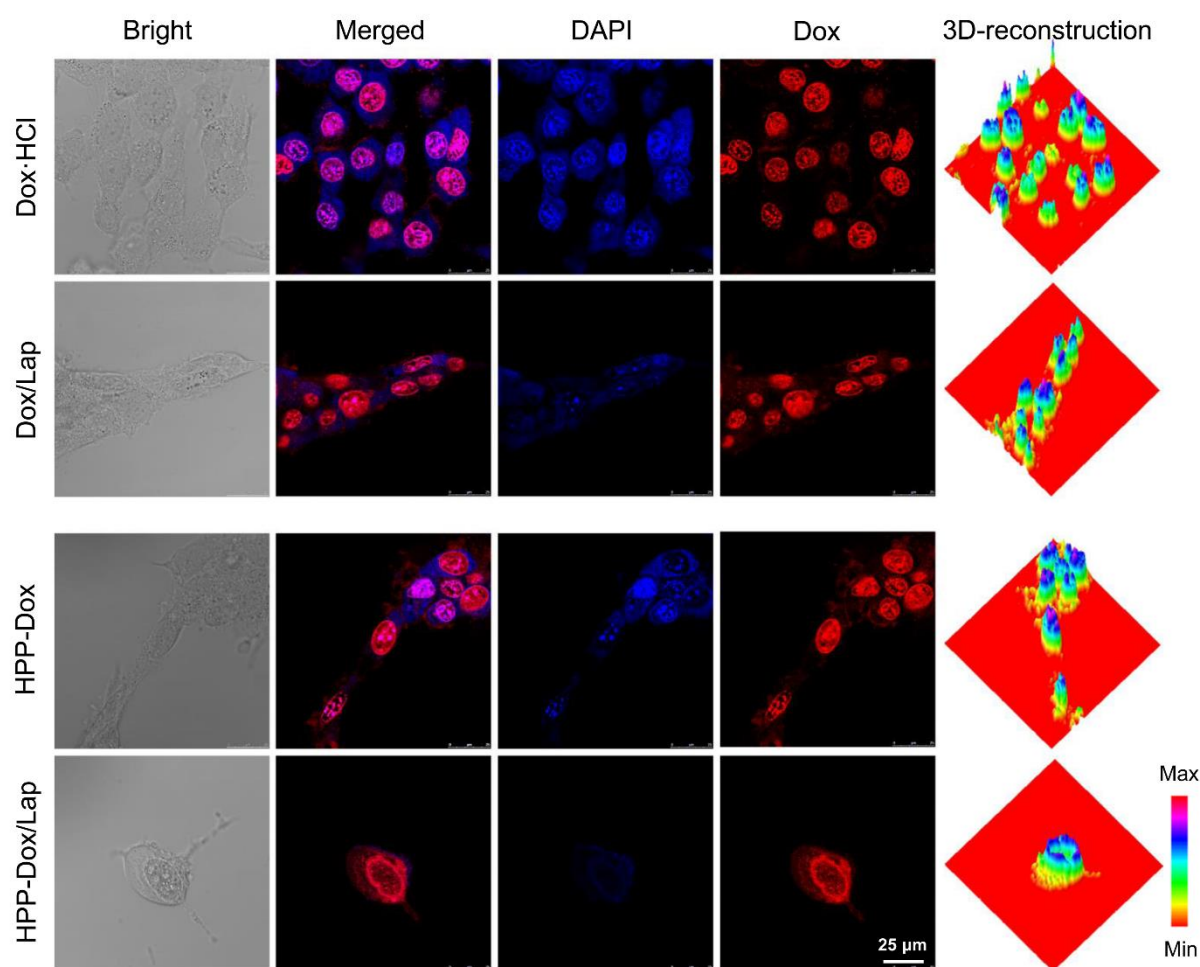

**Figure S10.** CLSM images and 3D-reconstruction images of Dox penetration into 4T1 cells after 4 and 12 h incubation with Dox·HCl and Dox/Lap, respectively.

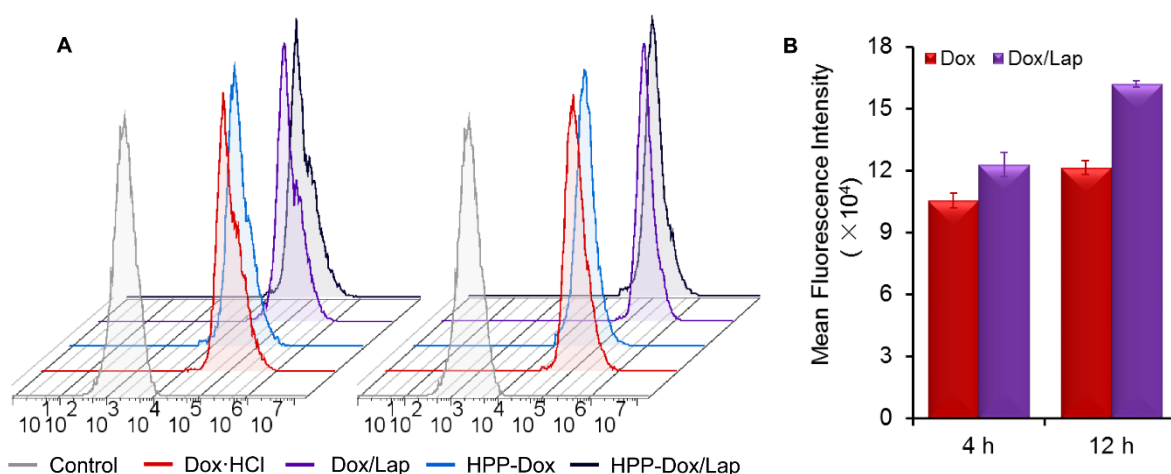

**Figure S11.** (A) Flow cytometry analysis and (B) Mean fluorescence intensity of intracellular Dox from the flow cytometric results after incubation with different formulations for 4 and 12 h, respectively.

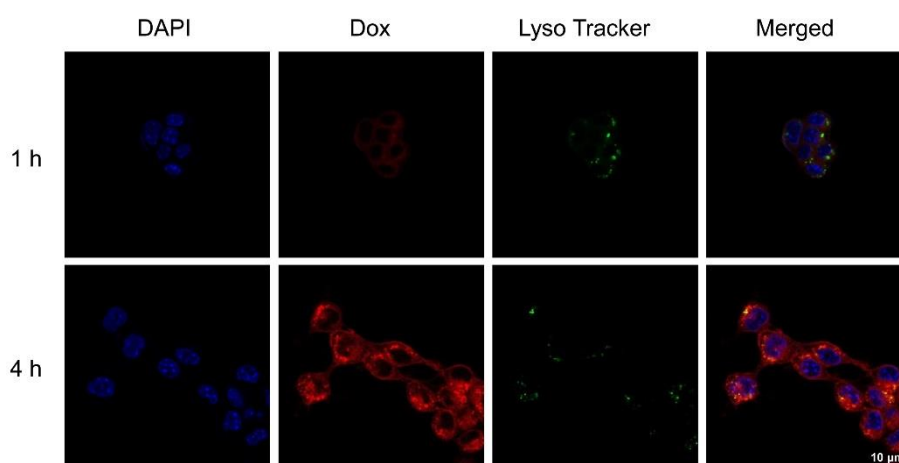

**Figure S12.** CLSM images of endosomal escape in 4T1 cells treated with HPP-Dox/Lap NPs for 1 h and 4 h, respectively, and then incubated with Lyso Tracker-Green and Hoechst 33342.



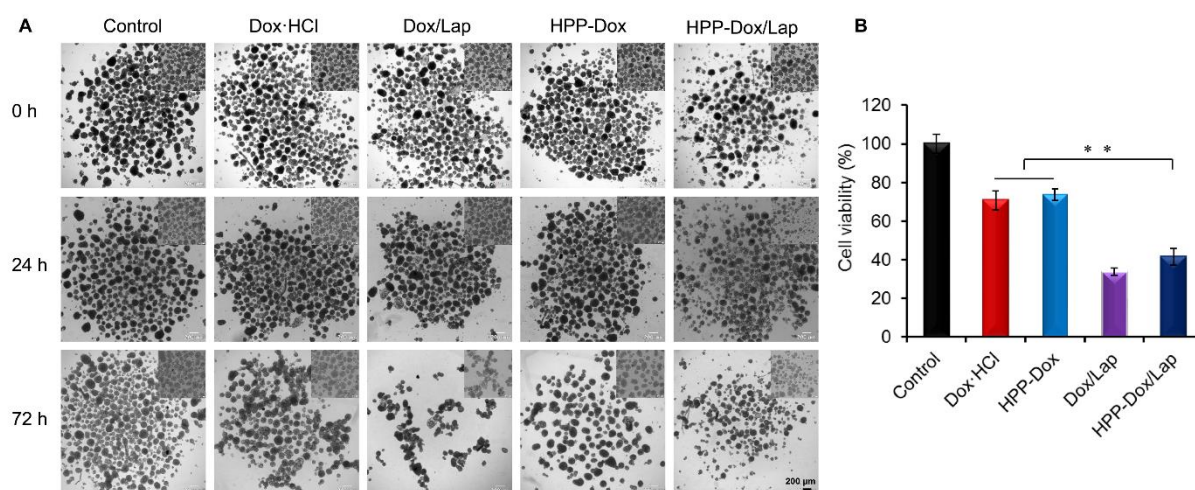

**Figure S13.** (A) Typical micrographs of 3D-cultured tumor spheres from 4T1 cells after treatment with various formulations for 24 h and 72 h, respectively. (B) The relative cell viabilities of 3D suspension tumor spheres incubated with different formulations for 72 h.

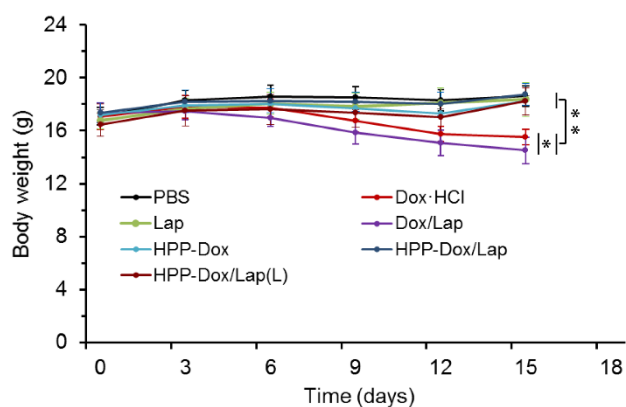

**Figure S14.** Body weight changes of tumor-bearing BALB/c mice after 15 days following administration with different formulations. n=10, \*p < 0.05, \*\*p < 0.01.



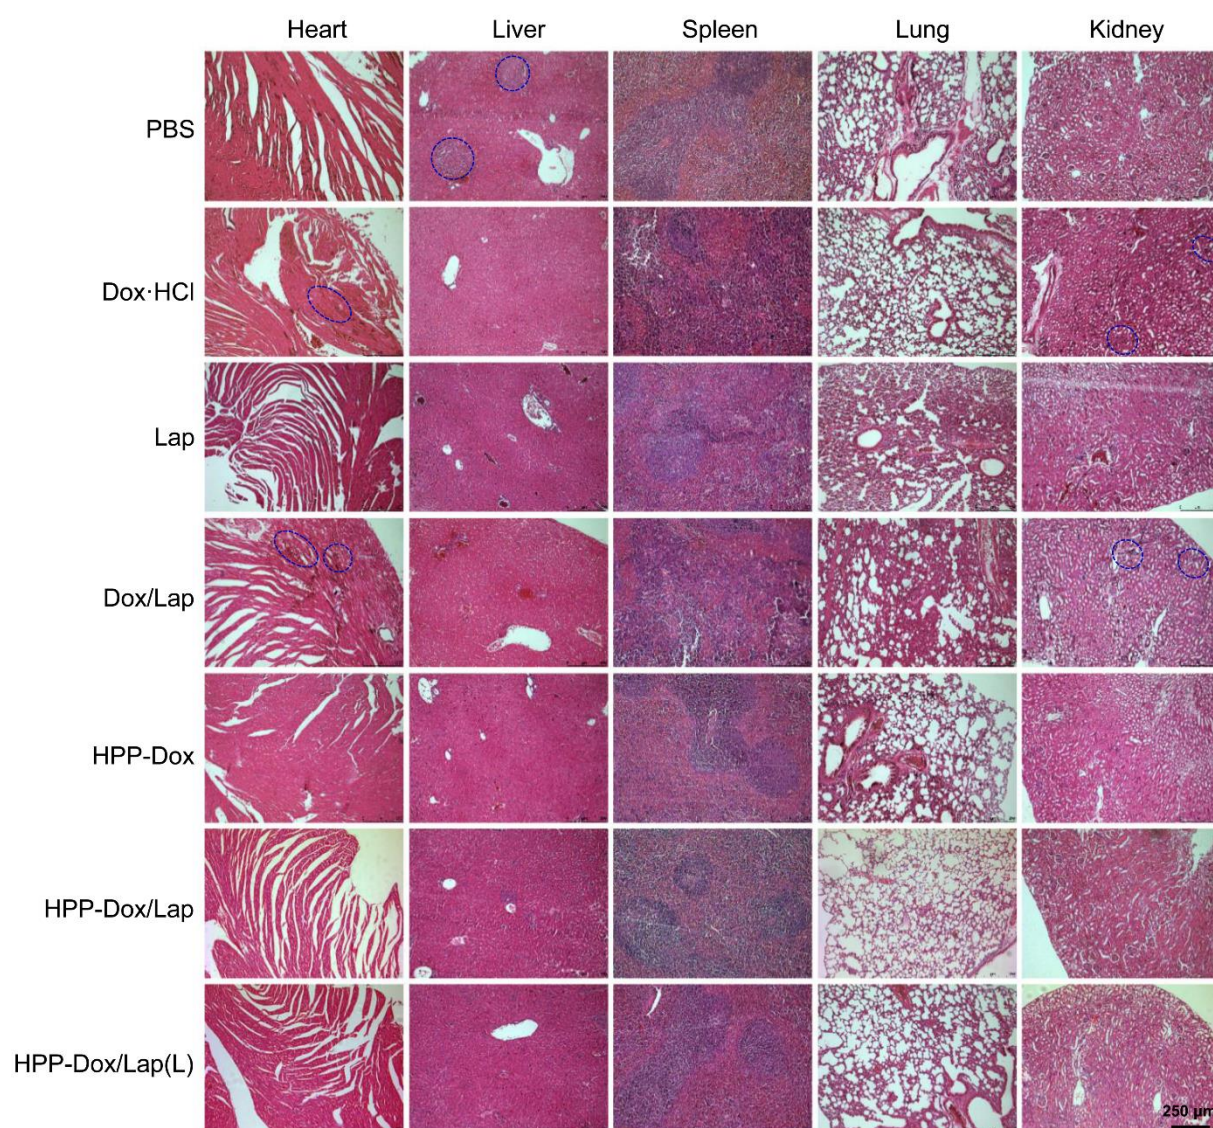

**Figure S15.** Histological observations after H&E staining for different organs of tumor-bearing BALB/c mice after treatment with different formulations for 15 days. Blue circles indicate the damage of organs.

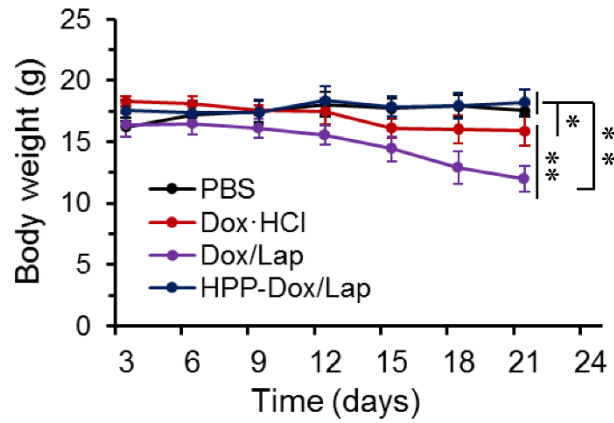

**Figure S16.** Body weight changes of tumor-bearing BALB/c mice after removal of the primary tumor following administration with different formulations. n=5, \*p < 0.05, \*\*p < 0.01.

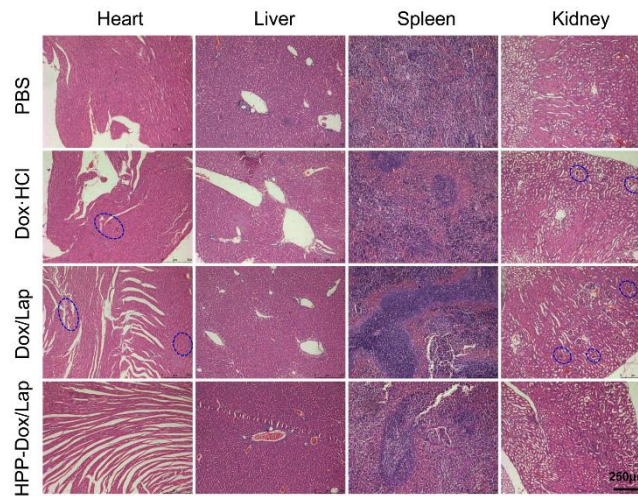

**Figure S17.** Histopathologic examination of the organs from postoperative 4T1 recurrence and metastasis model after 15 days following administration with different formulations. Blue circles indicate the damage of organs.

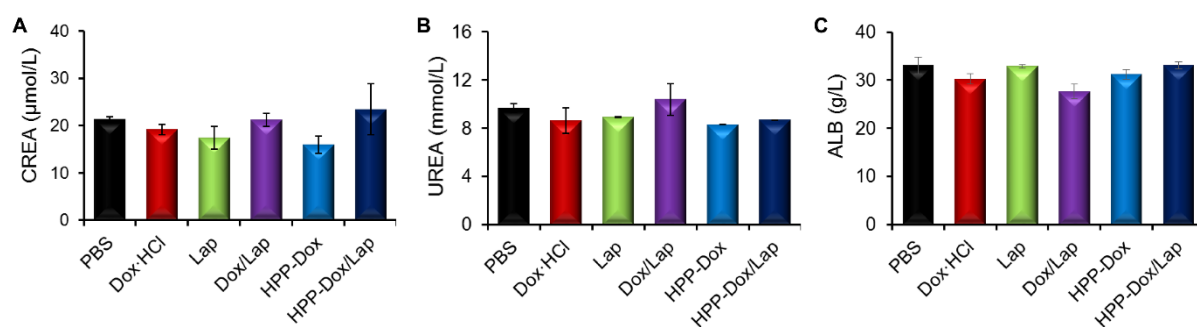

**Figure S18.** Biochemical markers (A) CREA, (B) UREA and (C) ALB levels in plasma from normal BALB/C mice after 15 days following administration with different formulations.

## Supplementary Tables

**Table S1.** Physicochemical characteristics and IC<sub>50</sub> value of various formulations.

|             | Theoretic<br>al ratio:<br>Lap/Dox | Quality<br>ratio:<br>Lap/Dox | DLC of<br>Dox (%) | DLC of<br>Lap (%) | EE of<br>Lap (%) | IC <sub>50</sub> of Dox<br>(μg/mL) | IC <sub>50</sub> of Lap<br>(μg/mL) |
|-------------|-----------------------------------|------------------------------|-------------------|-------------------|------------------|------------------------------------|------------------------------------|
| Dox         | —                                 | —                            | —                 | —                 | —                | 1.64 ± 0.17                        | —                                  |
| Lap         | —                                 | —                            | —                 | —                 | —                | —                                  | 17.29 ± 3.53                       |
| PP-Dox      | —                                 | —                            | 5.94              | —                 | —                | 1.79 ± 0.21                        | —                                  |
| PP-Dox/Lap  | 1                                 | 0.89                         | 5.64              | 5.02              | 89               | 1.17 ± 0.18                        | 1.05 ± 0.24                        |
| PP-Dox/Lap  | 4                                 | 3.78                         | 4.83              | 18.2              | 93.8             | 0.38 ± 0.03                        | 1.53 ± 0.13                        |
| PP-Dox/Lap  | 8                                 | 6.18                         | 4.17              | 29.8              | 89.4             | 0.29 ± 0.017                       | 2.31 ± 0.20                        |
| PP-Dox/Lap  | 12                                | 11.09                        | 3.58              | 39.7              | 92.3             | 0.19 ± 0.02                        | 2.30 ± 0.28                        |
| PP-Dox/Lap  | 16                                | 14.72                        | 3.17              | 46.7              | 91.9             | 0.24 ± 0.03                        | 3.83 ± 0.38                        |
| PP-Dox/Lap  | 20                                | 18.35                        | 2.84              | 52.1              | 91.4             | 0.20 ± 0.02                        | 4.12 ± 0.40                        |
| HPP-Dox     | —                                 | —                            | 3.05              | —                 | —                | 1.42 ± 0.16                        | —                                  |
| HPP-Dox/Lap | 12                                | —                            | 2.35              | 26.08             | —                | 0.16 ± 0.017                       | 2.0 ± 0.197                        |

**Table S2.** The sensitizing effect on various formulations to free drugs.

|             | IC <sub>50</sub> of Dox<br>( $\mu\text{g/mL}$ ) | IC <sub>50</sub> of Lap<br>( $\mu\text{g/mL}$ ) | CI    | Sensitization ratio to |      |
|-------------|-------------------------------------------------|-------------------------------------------------|-------|------------------------|------|
|             |                                                 |                                                 |       | Dox                    | Lap  |
| Lap         | —                                               | 17.29 $\pm$ 3.53                                | —     | —                      | 1    |
| Dox·HCl     | 1.64 $\pm$ 0.17                                 | —                                               | —     | 1                      | —    |
| PP-Dox      | 1.79 $\pm$ 0.21                                 | —                                               | —     | 0.92                   | —    |
| HPP-Dox     | 1.42 $\pm$ 0.16                                 | —                                               | —     | 1.15                   | —    |
| PP-Dox/Lap  | 0.19 $\pm$ 0.02                                 | 2.30 $\pm$ 0.28                                 | 0.24  | 8.63                   | 7.52 |
| HPP-Dox/Lap | 0.16 $\pm$ 0.017                                | 2.0 $\pm$ 0.197                                 | 0.213 | 10.25                  | 8.65 |

**Table S3.** The characterization of size and zeta potential of various formulations.

|             | Size (d. nm)     | PDI               | Zeta Potential (mV) |
|-------------|------------------|-------------------|---------------------|
| PP-Dox      | 33.28 $\pm$ 3.73 | 0.17 $\pm$ 0.037  | -16.57 $\pm$ 1.33   |
| HPP-Dox     | 30.56 $\pm$ 4.20 | 0.21 $\pm$ 0.025  | -26.45 $\pm$ 2.82   |
| PP-Dox/Lap  | 83.76 $\pm$ 3.85 | 0.112 $\pm$ 0.021 | -14.27 $\pm$ 0.83   |
| HPP-Dox/Lap | 50.95 $\pm$ 6.38 | 0.099 $\pm$ 0.006 | -28.60 $\pm$ 2.08   |
